# Supplementary material
Source: Springer Nature journal article supplement (https://www.springermedizin.de/resource/supplementary/12908_2006_47_MOESM4_ESM.pdf/9525308)

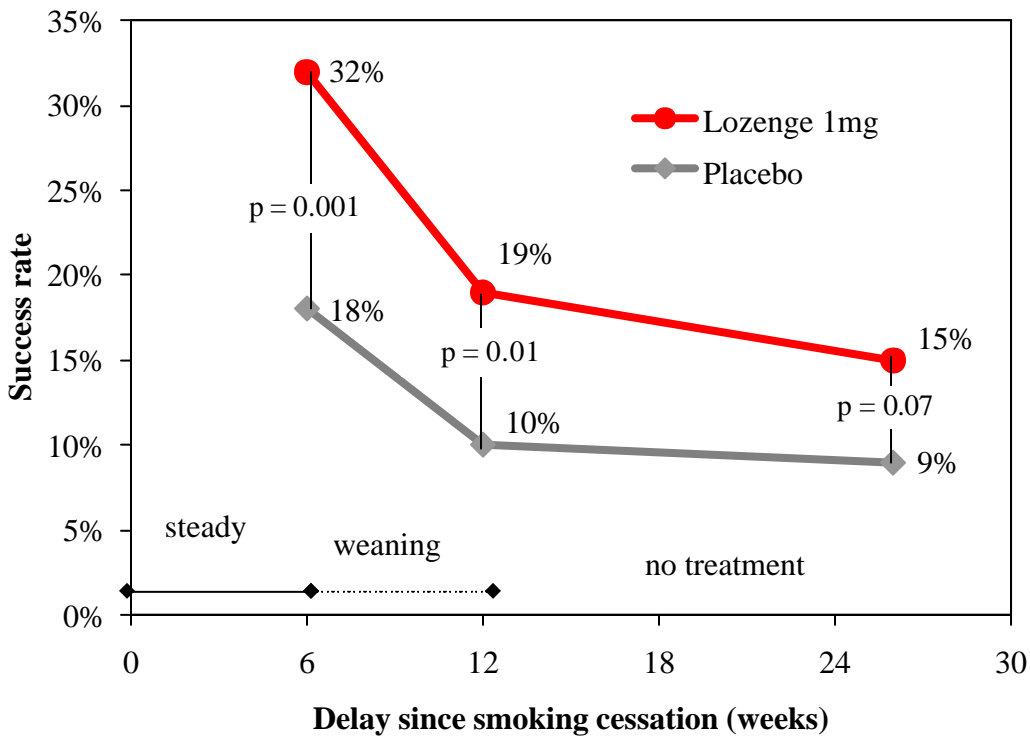

Supplement: MOESM4 [file 9525308]
